# Supplementary material for: Combined inhibition of BET proteins and class I HDACs synergistically induces apoptosis in urothelial carcinoma cell lines
Source: PubMed Central journal article supplement (PMC5755363; doi:10.1186/s13148-017-0434-3), 2018-01-04
Supplement: 13148_2017_434_MOESM1_ESM.pdf [file 13148_2017_434_MOESM1_ESM.pdf]

## Additional file 1

**qRT-PCR Primers**

| Target                 | 5'-3' sequence forward     | 5'-3' sequence reverse         | Product size [bp] |
|------------------------|----------------------------|--------------------------------|-------------------|
| p57 /<br><i>CDKN1C</i> | GCGGCGATCAA<br>GAAGCTG     | CGACGACTTCTC<br>AGGCGC         | 71                |
| BCL-XI                 | TAAACTGGGGT<br>CGCATTGTG   | AGGTAAGTGGCC<br>ATCCAAGC       | 118               |
| BCL-Xs                 | GCAGTAAAGCA<br>AGCGCTGAG   | GTTCCACAAAAGT<br>ATCCTGTTCAAAG | 139               |
| BCL-2                  | CCTGTGGATGA<br>CTGAGTACCTG | CAGAGGCCGCAT<br>GCTGGG         | 106               |
| TBP                    | ACAACAGCCTG<br>CCACCTTA    | GAATAGGCTGTG<br>GGTCAGT        | 119               |

## ChIP qPCR Primers

| Target                  | 5'-3' sequence forward       | 5'-3' sequence reverse       | Product size [bp] |
|-------------------------|------------------------------|------------------------------|-------------------|
| <i>BCL-2</i> TSS        | CCGTTGCTTTTCCTCT<br>GGGA     | CATCTCCCGCATCCC<br>ACTC      | 126               |
| <i>BCL-2</i> TSS +2kb   | TGTGGTGTGCTTCTT<br>GACATCT   | GTGCTTCCTTTTATAGCC<br>TCTTGG | 118               |
| <i>BCL-2</i> TSS -2kb   | TGTGGGAGTGTGTGT<br>GTCGC     | GAGCGCCGGTAACACAA<br>CGT     | 93                |
| <i>BCL-X</i> TSS        | GACTCAGTGAGTGAG<br>CAGGTGT   | CTCCAGCTGTATCCTTTC<br>TGGG   | 136               |
| <i>BCL-X</i> TSS +2kb   | CCCTGACCCACCCC<br>AGTTA      | TGAGTTTGCCCTGGAACC<br>CC     | 132               |
| <i>BCL-X</i> TSS -2kb   | ACAAGCCGGCCTCAG<br>TTTCC     | TCTCTCCCCGGTCCTGAT<br>GC     | 139               |
| <i>BIRC5</i> TSS        | AACCGCCAGATTTGAA<br>TCGC     | GATGCGGTGGTCCTTGA<br>GAA     | 108               |
| <i>BIRC5</i> TSS +2kb   | TGAGAATGTTGGAGG<br>GATTTGACA | GCACCTTCTCTCTCCCTG<br>TGG    | 148               |
| <i>BIRC5</i> TSS -2kb   | CGTCCTTGGTCTGTG<br>CCTGG     | GTCCTGCTGATTGGCTCG<br>CT     | 82                |
| <i>c-MYC</i> TSS        | GTCTTTTCTCCCATTC<br>CTGCG    | GCCTTCTCCTCTCCCATC<br>TTG    | 128               |
| <i>c-MYC</i> TSS +2kb   | CCACCTCCAGCTTGTA<br>CCTGC    | AGAAGGCGCTGGAGTCT<br>TGC     | 135               |
| <i>c-MYC</i> TSS -2kb   | TGCGGGTTACATACAG<br>TGCACT   | GGAGAGGAGTATTACTTC<br>CGTGCC | 150               |
| <i>p57KIP2</i> TSS      | GCTGCCCGCGTTTGC              | CGCACTAGTACTGGGAA<br>GGTCC   | 105               |
| <i>p57KIP2</i> TSS +2kb | AAAACCGAACGCTGCT<br>CTGC     | TAGAGCCCAAAGAGCCC<br>CGA     | 125               |
| <i>p57KIP2</i> TSS -2kb | TCGGGATGGGGACTG<br>TCAGA     | TCAAAGGCAGGCTGGTT<br>GGG     | 149               |
| <i>SKP2</i> TSS         | GCGAGCAGCTCTGCA<br>GTTA      | TAGCGATATTCGCGGCCT<br>AA     | 138               |
| <i>SKP2</i> TSS +2kb    | CCACTGCAAAGACCCT<br>GGTG     | ACCTCCAGCCTGATCTCC<br>CC     | 114               |
| <i>SKP2</i> TSS -2kb    | GCTTAGCCTAGGATTC<br>TGCACC   | TGCCTCTTGAGGAAGGA<br>ATTCA   | 123               |

## Antibodies

| Target                     | Cat.-No. | Source                  | dilution      |
|----------------------------|----------|-------------------------|---------------|
| Rabbit-IgG                 | sc-2004  | SantaCruz Biotechnology | 1:5000        |
| Mouse-IgG                  | sc-2005  | SantaCruz Biotechnology | 1:5000        |
| $\alpha$ -tubulin          | ab4075   | abcam                   | 1:10000       |
| BRD4                       | ab84776  | abcam                   | 1:1000        |
| C-MYC                      | #13987   | CellSignalingTechnology | 1:1000        |
| PARP                       | #9532    | CellSignalingTechnology | 1:1000        |
| cleaved PARP               | #9541    | CellSignalingTechnology | 1:1000        |
| Caspase-3                  | #9665    | CellSignalingTechnology | 1:1000        |
| cleaved Caspase-3          | #9664    | CellSignalingTechnology | 1:500         |
| EZH2                       | ab3748   | abcam                   | 1:1000        |
| p-p57KIP2_T310             | #2558    | CellSignalingTechnology | 1:1000        |
| p57KIP2                    | #2557    | CellSignalingTechnology | 1:500         |
| pAKT_S473                  | #4058    | CellSignalingTechnology | 1:1000        |
| AKT                        | #2967    | CellSignalingTechnology | 1:1000        |
| SKP2                       | #4358    | CellSignalingTechnology | 1:500         |
| BCL-XI                     | 556361   | BD                      | 1:2000        |
| Survivin                   | #2808    | CellSignalingTechnology | 1:1000        |
| STAT3                      | #9139    | CellSignalingTechnology | 1:1000        |
| pSTAT3                     | #9145    | CellSignalingTechnology | 1:1000        |
| H3                         | #3638    | CellSignalingTechnology | 1:1000        |
| H3Ac                       | 39139    | active motif            | 1:2000        |
| H4Ac                       | 39243    | active motif            | 1:1000        |
| Rabbit IgG isotype control | 31887    | invitrogen              | 15 $\mu$ g/ml |
| H3K27Ac                    | 39133    | active motif            | 15 $\mu$ g/ml |
| H3K4me3                    | 39915    | active motif            | 15 $\mu$ g/ml |
