# Supplementary material for: Combined inhibition of BET proteins and class I HDACs synergistically induces apoptosis in urothelial carcinoma cell lines
Source: PubMed Central journal article supplement (PMC5755363; doi:10.1186/s13148-017-0434-3), 2018-01-04

## Additional file 2

**A**

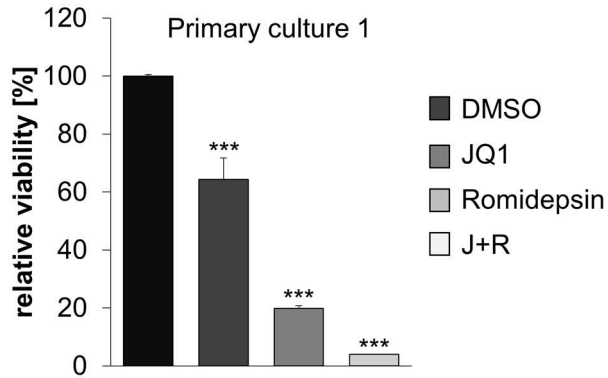

**B**

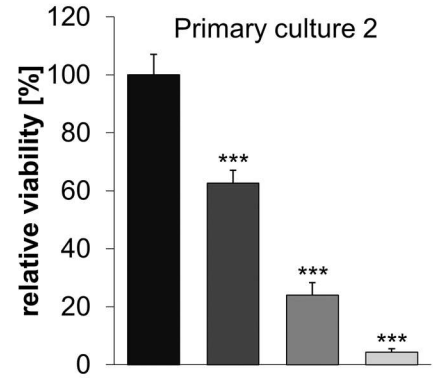

**C**

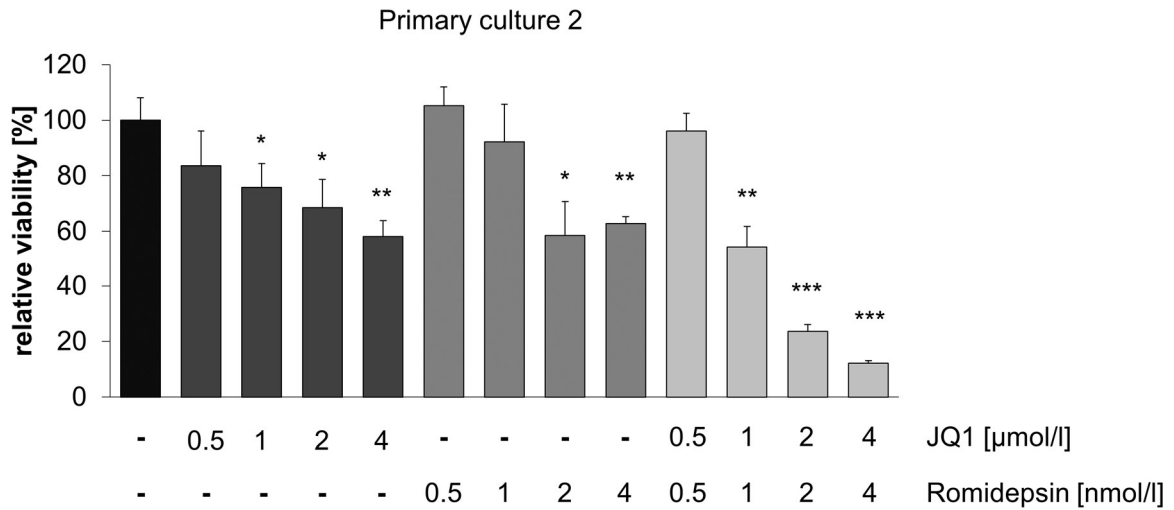

**D**

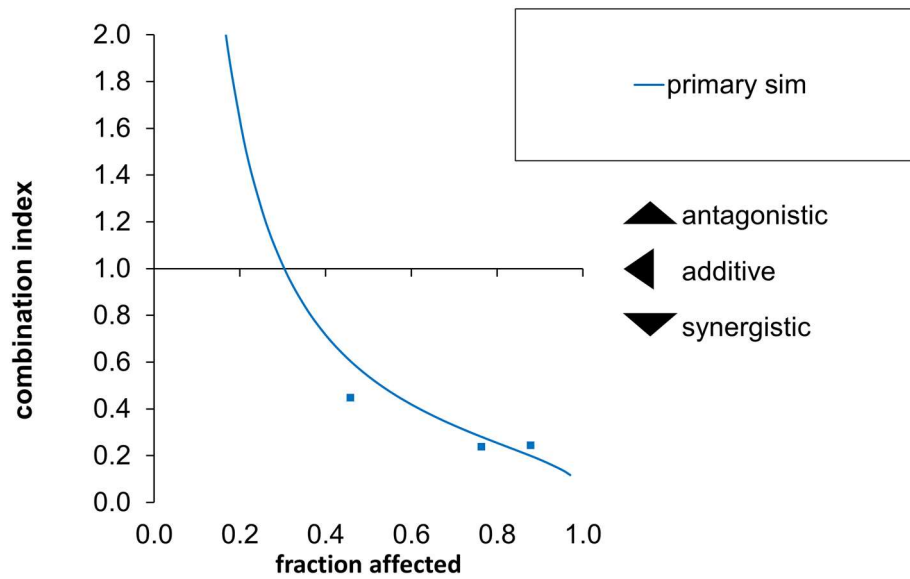

Supplement: 13148_2017_434_MOESM2_ESM.pdf [file 13148_2017_434_MOESM2_ESM.pdf]
