# Supplementary material for: Combined inhibition of BET proteins and class I HDACs synergistically induces apoptosis in urothelial carcinoma cell lines
Source: PubMed Central journal article supplement (PMC5755363; doi:10.1186/s13148-017-0434-3), 2018-01-04
Supplement: 13148_2017_434_MOESM3_ESM.pdf [file 13148_2017_434_MOESM3_ESM.pdf]

### Additional file 3

## Detailed flow cytometry results

| To Fig. 2D                   |            | sub-G1 | G0/G1 | S    | G2/M [%] |
|------------------------------|------------|--------|-------|------|----------|
| VM-Cub1                      | DMSO       | 3.4    | 64.5  | 12.4 | 18.7     |
|                              | JQ1        | 3.7    | 85.5  | 4.9  | 5.7      |
|                              | Romidepsin | 3.4    | 67    | 2    | 27.4     |
|                              | J+R        | 26.7   | 23.1  | 1.9  | 47.9     |
| UM-UC-3                      | DMSO       | 2.3    | 58.2  | 22.2 | 16.4     |
|                              | JQ1        | 3.2    | 54.9  | 13.8 | 28.2     |
|                              | Romidepsin | 3.3    | 55.9  | 14.7 | 25.4     |
|                              | J+R        | 18.3   | 23.3  | 4.4  | 53.8     |
| 639-V                        | DMSO       | 0.7    | 44    | 20.4 | 33.7     |
|                              | JQ1        | 2.2    | 50.4  | 11.1 | 35.6     |
|                              | Romidepsin | 2.6    | 47.1  | 17.1 | 32.1     |
|                              | J+R        | 12.9   | 48.6  | 7.7  | 29.8     |
| T24                          | DMSO       | 2.3    | 54.2  | 20.4 | 22.2     |
|                              | JQ1        | 1.8    | 55.8  | 22.5 | 19       |
|                              | Romidepsin | 2.5    | 78.2  | 5.9  | 13       |
|                              | J+R        | 49.6   | 37.1  | 2.4  | 10.3     |
| HBLAK                        | DMSO       | 1      | 77.6  | 13.1 | 7.8      |
|                              | JQ1        | 1      | 86.5  | 7.5  | 4.6      |
|                              | Romidepsin | 1.1    | 84.1  | 8.1  | 6.4      |
|                              | J+R        | 1.6    | 95.5  | 1    | 1.8      |
|                              |            |        |       |      |          |
| To Fig. 5D                   |            | sub-G1 | G0/G1 | S    | G2/M [%] |
| VM-Cub1 parental             | DMSO       | 1.5    | 58.8  | 17.8 | 21.1     |
|                              | J+R        | 16.7   | 37.4  | 3.4  | 42       |
| VM-Cub1 p57 <sup>(-/-)</sup> | DMSO       | 5.2    | 49.7  | 21.4 | 22.8     |
|                              | J+R        | 67.1   | 8.5   | 9.7  | 14.2     |
