# Supplementary material for: Combined inhibition of BET proteins and class I HDACs synergistically induces apoptosis in urothelial carcinoma cell lines
Source: PubMed Central journal article supplement (PMC5755363; doi:10.1186/s13148-017-0434-3), 2018-01-04

# Additional file 4

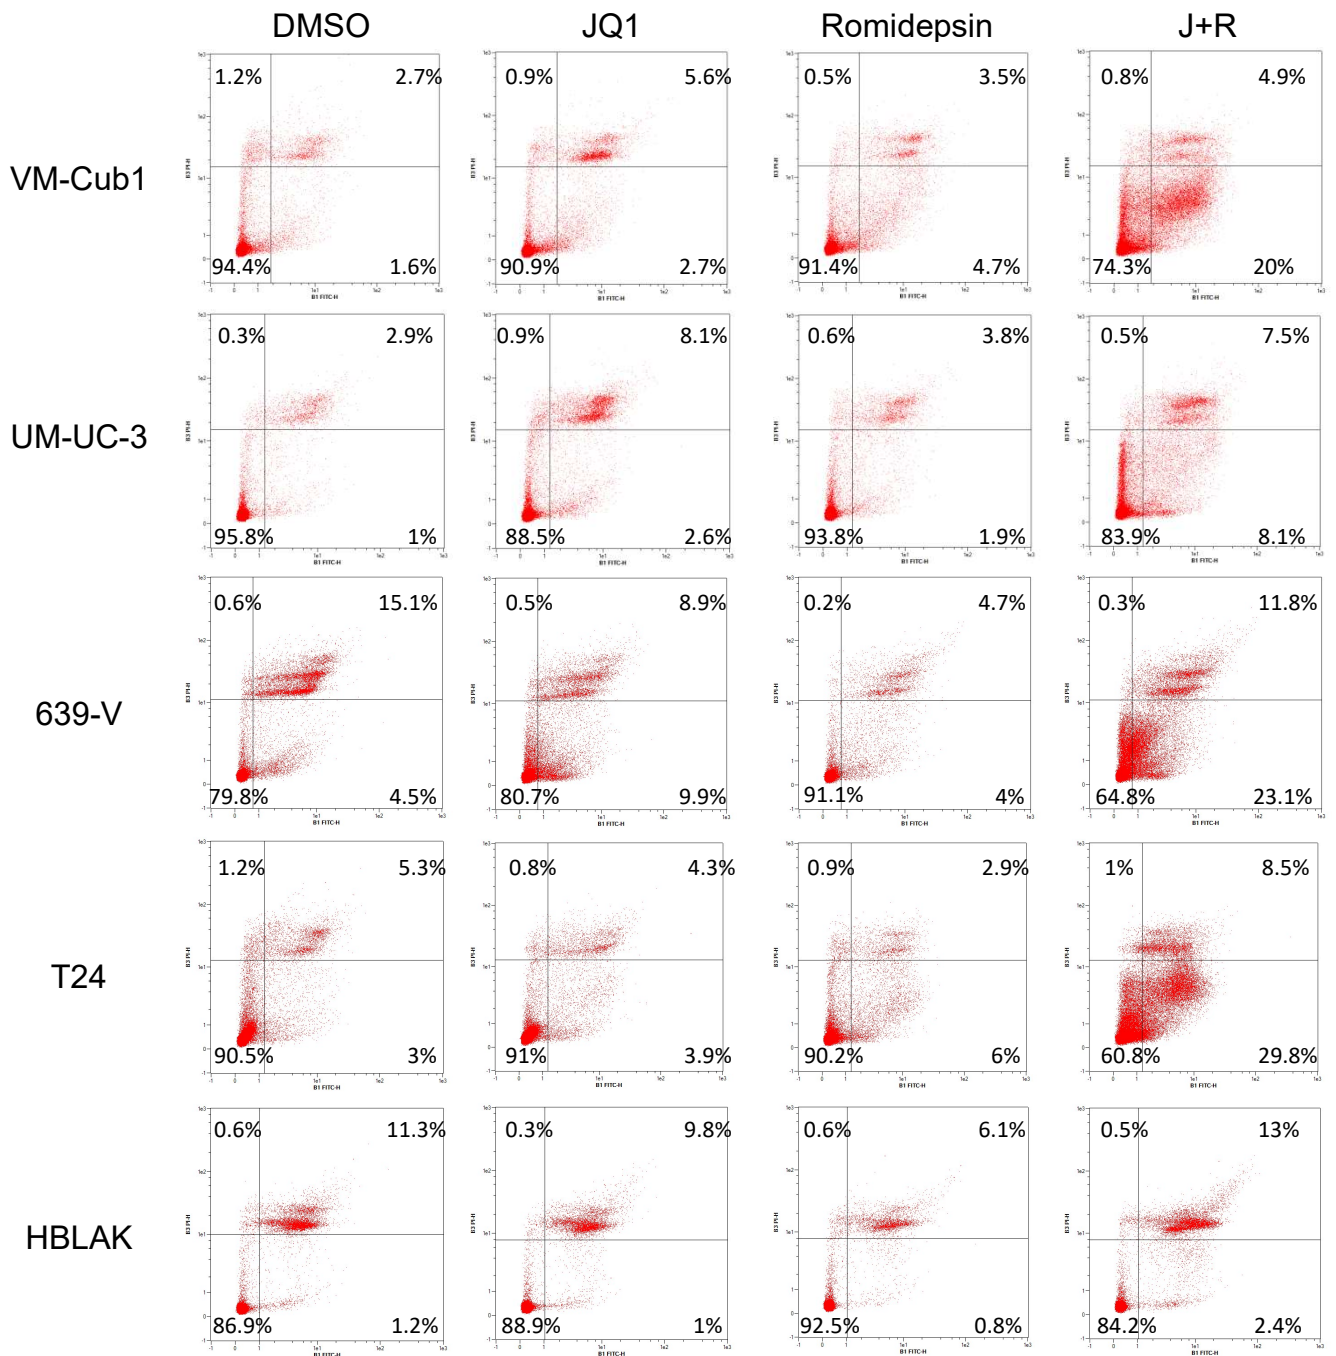

Supplement: 13148_2017_434_MOESM4_ESM.pdf [file 13148_2017_434_MOESM4_ESM.pdf]
